# Supplementary material for: Comparative efficacy of gas therapy for diabetic foot ulcers using network meta-analysis
Source: PeerJ. 2025 Jun 16;13:e19571. doi: 10.7717/peerj.19571 (PMC12178245; doi:10.7717/peerj.19571)
Supplement: Supplemental Information 2 [file peerj-13-19571-s002.xlsx]

## Sheet: Gourp
ID	method
HBOT	Hyperbaric oxygen therapy
SOC	Standard of care
HBAT	Hyperbaric air therapy
TOT	Topical oxygen therapy
THOT	Topical Hyperbaric Oxygen therapy
OOT	Oxygen-Ozone Therapy
OT	Ozone Therapy
CO2	Carbon dioxide
CAP	Cold atmospheric plasma

## Sheet: healing rate
study	treatment	responders	sampleSize
Chen, 2017	ZHBOT	5	20
Chen, 2017	SOC	1	18
Duzgun, 2008	ZHBOT	33	50
Duzgun, 2008	SOC	0	50
Salama, 2019	ZHBOT	5	15
Salama, 2019	SOC	0	15
Fedorko, 2016	ZHBOT	10	49
Fedorko, 2016	ZHBAT	12	54
Santema, 2018	ZHBOT	33	60
Santema, 2018	SOC	29	60
Löndahl, 2010	ZHBOT	23	38
Löndahl, 2010	ZHBAT	10	37
Abidia, 2002	ZHBOT	5	8
Abidia, 2002	ZHBAT	1	8
Kessler, 2003	ZHBOT	2	14
Kessler, 2003	SOC	0	13
Ma, 2013	ZHBOT	0	18
Ma, 2013	SOC	0	18
Kumar,2020	ZHBOT	22	28
Kumar,2020	SOC	0	26
Frykberg, 2020	TOT	15	36
Frykberg, 2020	SOC	5	37
Serena, 2021	TOT	36	81
Serena, 2021	SOC	18	64
He, 2021	TOT	29	40
He, 2021	SOC	17	42
Niederauer, 2018	TOT	24	74
Niederauer, 2018	SOC	12	72
Driver, 2017	TOT	35	65
Driver, 2017	SOC	31	63
Yu, 2016	TOT	9	10
Yu, 2016	SOC	3	10
Al-Jalodi,2022	TOT	36	81
Al-Jalodi,2022	SOC	18	64
Zhang, 2014	OOT	6	25
Zhang, 2014	SOC	3	25
Wainstein,2011	OOT	13	32
Wainstein,2011	SOC	10	29
Martinez‐Sanchez, 2005	OT	39	51
Martinez‐Sanchez, 2005	SOC	34	49
Edmonds, 2018	NOT	30	75
Edmonds, 2018	SOC	19	73
Macura, 2020	CO2	20	30
Macura, 2020	SOC	0	27

## Sheet: time to healing
study	treatment	mean	std.dev	sampleSize
Kumar,2020	HBOT	240	60	28
Kumar,2020	SOC	300	60	26
Frykberg, 2020	TOT	57.4	29.4	36
Frykberg, 2020	SOC	44.1	13.3	37
He, 2021	TOT	48.39	13.32	40
He, 2021	SOC	76.42	32.78	40
Niederauer, 2018	TOT	48.389	19.4482	74
Niederauer, 2018	SOC	62.1383	27.8628	72
Wang, 2021	TOT	19	5.9	29
Wang, 2021	SOC	26	3.3	29
Martinez‐Sanchez, 2005	OT	21	10	51
Martinez‐Sanchez, 2005	SOC	45	11	49

## Sheet: area reduction
study	treatment	mean	std.dev	sampleSize
Salama, 2019	HBOT	0.7254	0.184836	15
Salama, 2019	SOC	0.2293	0.163851	15
Fedorko, 2016	HBOT	0.5	1.0955	39
Fedorko, 2016	HBAT	0.5	1.37182	48
Abidia, 2002	HBOT	0.84926	0.230093	8
Abidia, 2002	HBAT	0.44463	0.449728	8
Kessler, 2003	HBOT	0.418	0.255	14
Kessler, 2003	SOC	0.217	0.169	13
Ma, 2013	HBOT	0.424	0.2	18
Ma, 2013	SOC	0.181	0.065	18
Dhamodharan, 2019	HBOT	0.518	0.0566	15
Dhamodharan, 2019	SOC	0.2622	0.0528	17
Perren, 2018	HBOT	0.31969	0.179863	13
Perren, 2018	SOC	0.099056	0.083398	13
Wadee，2021	HBOT	0.91788	0.115929	25
Wadee，2021	SOC	0.019607	0.136363	25
Frykberg, 2020	TOT	0.652317	0.91059	36
Frykberg, 2020	SOC	0.124224	0.543478	37
Serena, 2021	TOT	0.4638	1.0024	81
Serena, 2021	SOC	0.4105	0.6982	64
He, 2021	TOT	0.634794	0.514672	40
He, 2021	SOC	0.52555	0.801111	40
Yu, 2016	TOT	0.9893	0.03388	10
Yu, 2016	SOC	0.2709	0.71396	9
Anirudh, 2021	TOT	0.036065	0.30244	10
Anirudh, 2021	SOC	0.433823	0.304482	9
Leslie, 1988	THOT	0.544	0.234	12
Leslie, 1988	SOC	0.644	0.23	16
Zhang, 2014	OOT	0.582623	0.0528	25
Zhang, 2014	SOC	0.294824	0.06	25
Wainstein,2011	OOT	0.408163	0.7959	32
Wainstein,2011	SOC	0.457143	0.485714	29
Martinez‐Sanchez, 2005	OT	0.7458	0.35	51
Martinez‐Sanchez, 2005	SOC	0.503	0.17	49
Edmonds, 2018	NOT	0.587	0.592	75
Edmonds, 2018	SOC	0.37	0.8058	73
Macura, 2020	CO2	0.927983	1.35656	30
Macura, 2020	SOC	0.25061	1.04427	27
Mirpour, 2020	CAP	0.627188	0.22711	22
Mirpour, 2020	SOC	0.404878	0.139941	22
Hiller,2022	CAP	0.60656	0.270489	14
Hiller,2022	SOC	0.201311	0.52	13
Samsavar,2021	CAP	0.972257	1.26716	10
Samsavar,2021	SOC	0.362989	1.26632	10

## Sheet: amputation rate
study	treatment	responders	sampleSize
Salama, 2019	HBOT	1	15
Salama, 2019	SOC	1	15
Chen, 2017	HBOT	1	20
Chen, 2017	SOC	2	18
Duzgun, 2008	HBOT	4	50
Duzgun, 2008	SOC	41	50
Fedorko, 2016	HBOT	25	49
Fedorko, 2016	HBAT	26	54
Santema, 2018	HBOT	7	60
Santema, 2018	SOC	13	60
Löndahl, 2010	HBOT	7	38
Löndahl, 2010	HBAT	5	37
Abidia, 2002	HBOT	2	8
Abidia, 2002	HBAT	1	8
Doctor, 1992	HBOT	6	15
Doctor, 1992	SOC	9	15
Faglia, 1996	HBOT	24	35
Faglia, 1996	SOC	23	33
Kumar,2020	HBOT	2	28
Kumar,2020	SOC	15	26
Frykberg, 2020	TOT	2	36
Frykberg, 2020	SOC	3	37
He, 2021	TOT	0	40
He, 2021	SOC	6	40
Driver, 2017	TOT	0	64
Driver, 2017	SOC	1	66
Anirudh, 2021	TOT	0	10
Anirudh, 2021	SOC	1	9
Izadi,2018	OT	19	100
Izadi,2018	SOC	57	100
Edmonds, 2018	NOT	0	75
Edmonds, 2018	SOC	2	73

## Sheet: adverse event
study	treatment	responders	sampleSize
Salama, 2019	HBOT	3	15
Salama, 2019	SOC	5	15
Fedorko, 2016	HBOT	20	49
Fedorko, 2016	HBAT	11	54
Santema, 2018	HBOT	5	60
Santema, 2018	SOC	0	60
Löndahl, 2010	HBOT	7	38
Löndahl, 2010	HBAT	7	37
98 Faglia, 1996	HBOT	3	35
98 Faglia, 1996	SOC	0	33
Frykberg, 2020	TOT	9	36
Frykberg, 2020	SOC	9	37
Serena, 2021	TOT	20	81
Serena, 2021	SOC	17	64
Niederauer, 2018	TOT	11	74
Niederauer, 2018	SOC	13	72
Driver, 2017	TOT	14	64
Driver, 2017	SOC	27	66
Anirudh, 2021	TOT	0	10
Anirudh, 2021	SOC	3	9
Wainstein,2011	OOT	5	32
Wainstein,2011	SOC	2	29
Edmonds, 2018	NOT	12	75
Edmonds, 2018	SOC	18	73
Stratmann, 2020	CAP	7	33
Stratmann, 2020	SOC	6	32
Samsavar,2021	CAP	1	10
Samsavar,2021	SOC	1	10

## Sheet: cost
study	treatment	mean	std.dev	sampleSize
Abidia, 2002	HBOT	£ 4972		8
Abidia, 2002	HBAT	£ 7946		8
